# Supplementary material for: Experimental and ab initio studies on the structural, magnetic, photocatalytic, and antibacterial properties of Cu-doped ZnO nanoparticles
Source: Royal Society of Chemistry journal article supplement (doi:10.1039/d2ra07204a), 2023-01-01
Supplement: d2ra07204a1.pdf [file d2ra07204a1.pdf]

Supporting Information for

**Experimental and *ab initio* studies of structural, magnetic, photocatalytic and antibacterial properties of Cu-doped ZnO nanoparticles**

*Ariunzaya Tsogoo,<sup>a,b</sup> Ninjbadgar Tsedev,<sup>c,d,e</sup> Alain Gibaud,<sup>a</sup> Philippe Daniel,<sup>a</sup> Abdelhadi Kassiba,<sup>a</sup> Masayuki Fukuda,<sup>d</sup> Yoshihiro Kusano,<sup>e,f</sup> Masaki Azuma,<sup>d</sup> Namsrai Tsogbadrakh,<sup>g</sup> Galbadrakh Ragchaa,<sup>g</sup> Rentsenmyadag Dashzeveg,<sup>b\*</sup> and Erdene-Ochir Ganbold,<sup>g\*</sup>*

Dr. Erdene-Ochir Ganbold

Department of Physics, School of Arts and Sciences, National University of Mongolia,  
University Street 1, Sukhbaatar district, Ulaanbaatar, 14201, Mongolia.

Email: [erdeneochir\\_g@num.edu.mn](mailto:erdeneochir_g@num.edu.mn)

Dr. Rentsenmyadag Dashzeveg

Department of Chemistry, School of Arts and Sciences, National University of Mongolia,  
University Street 1, Sukhbaatar district, Ulaanbaatar, 14201, Mongolia

Email: [d\\_rentsenmyadag@num.edu.mn](mailto:d_rentsenmyadag@num.edu.mn)

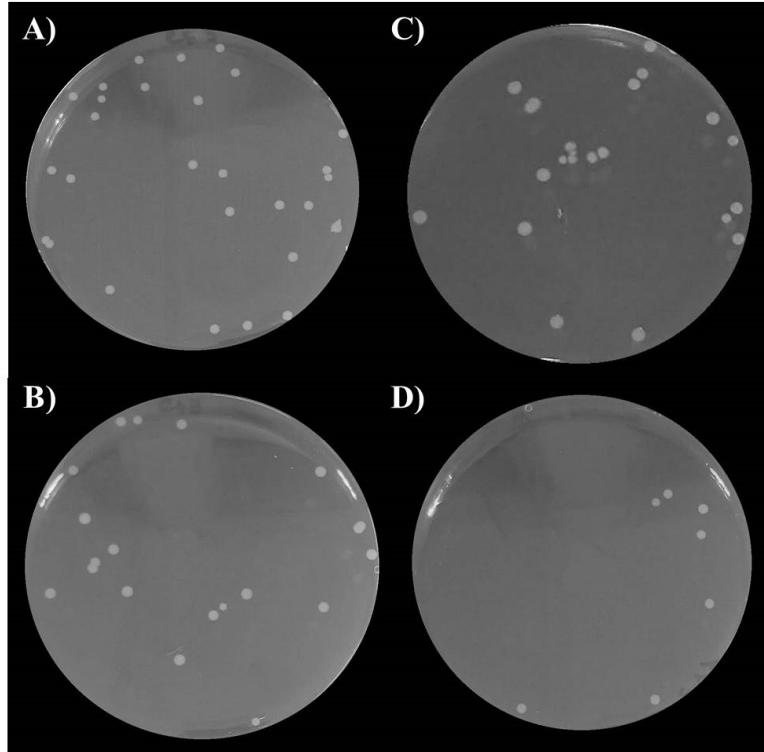

**Figure S1.** Antibacterial activity of Cu-doped ZnO nanoparticles against *E. coli*. Undoped ZnO nanoparticles (A), 1 mol% Cu-doped nanoparticles (B), 3 mol% Cu-doped nanoparticles (C) and 5 mol% Cu-doped nanoparticles (D), respectively.

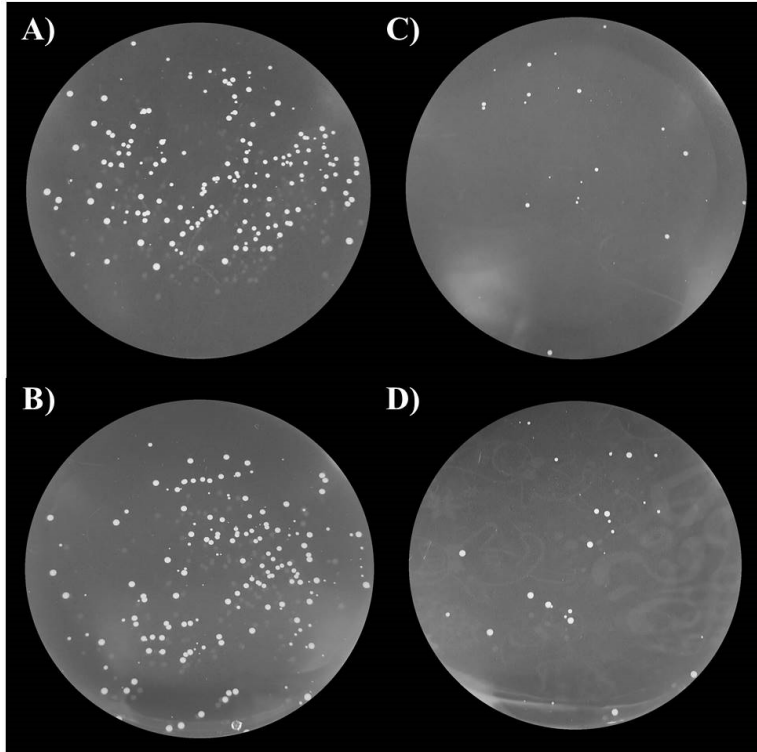

**Figure S2.** Antibacterial activity of Cu-doped ZnO nanoparticles against *S. aureus*. Undoped ZnO nanoparticles (A), 1 mol% Cu-doped nanoparticles (B), 3 mol% Cu-doped nanoparticles (C) and 5 mol% Cu-doped nanoparticles (D), respectively.
